# Supplementary material for: Conservation of tRNA mimicry in the 5′-untranslated region of distinct HIV-1 subtypes
Source: PubMed Central journal article supplement — RNA. 2017 Dec;23(12):1850–9. doi: 10.1261/rna.062182.117 (PMC5689005; doi:10.1261/rna.062182.117), 2017-12
Supplement: supp_062182.117_Supplemental_Fig_S2.pdf [file supp_062182.117_Supplemental_Fig_S2.pdf]

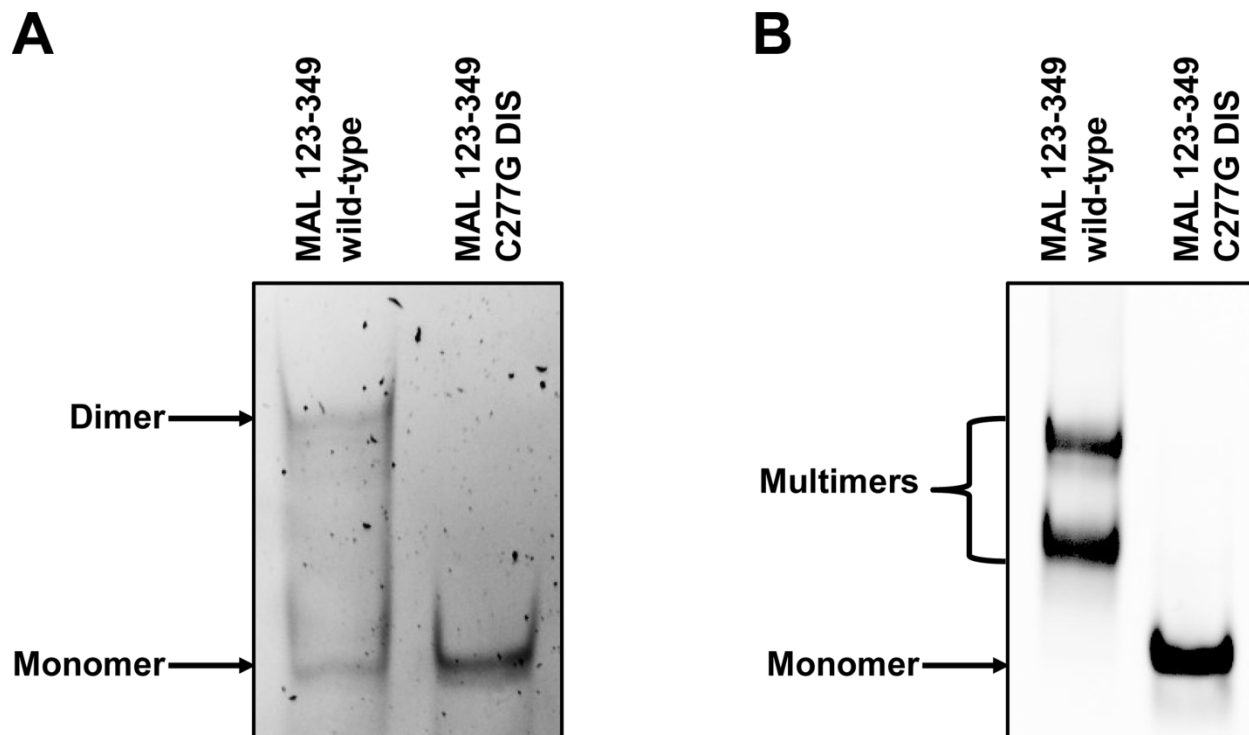

Figure S2. Native polyacrylamide gel electrophoresis (PAGE) shows the MAL 123-349 C277G DIS mutation completely inhibits RNA dimerization. (A) Native PAGE analysis of wild-type and C277G MAL 123-349 RNAs folded and treated exactly as for the fluorescence anisotropy binding assays (see Materials and Methods section). The final conditions were: 10 nM RNA, 20 mM Tris-HCl, pH 8, 15 mM NaCl, 35 mM KCl and 1 mM MgCl<sub>2</sub>. The RNA species were analyzed on an 8% native polyacrylamide TBM (89 mM Tris, 45 mM Borate, 1 mM MgCl<sub>2</sub>) gel at 4 °C at 120 V. (B) Native PAGE analysis of wild-type and C277G MAL 123-349 RNAs using higher RNA concentrations. The final conditions were 45 μM RNA, 50 mM HEPES, pH 7.4, 150 mM NaCl, 1 mM MgCl<sub>2</sub> and 3% w/v glycerol. The RNA species were analyzed on a 5% native polyacrylamide TBM gel at 4 °C at 100 V.
