# Supplementary material for: Conservation of tRNA mimicry in the 5′-untranslated region of distinct HIV-1 subtypes
Source: PubMed Central journal article supplement — RNA. 2017 Dec;23(12):1850–9. doi: 10.1261/rna.062182.117 (PMC5689005; doi:10.1261/rna.062182.117), 2017-12
Supplement: supp_062182.117_Supplemental_Fig_S3.pdf [file supp_062182.117_Supplemental_Fig_S3.pdf]

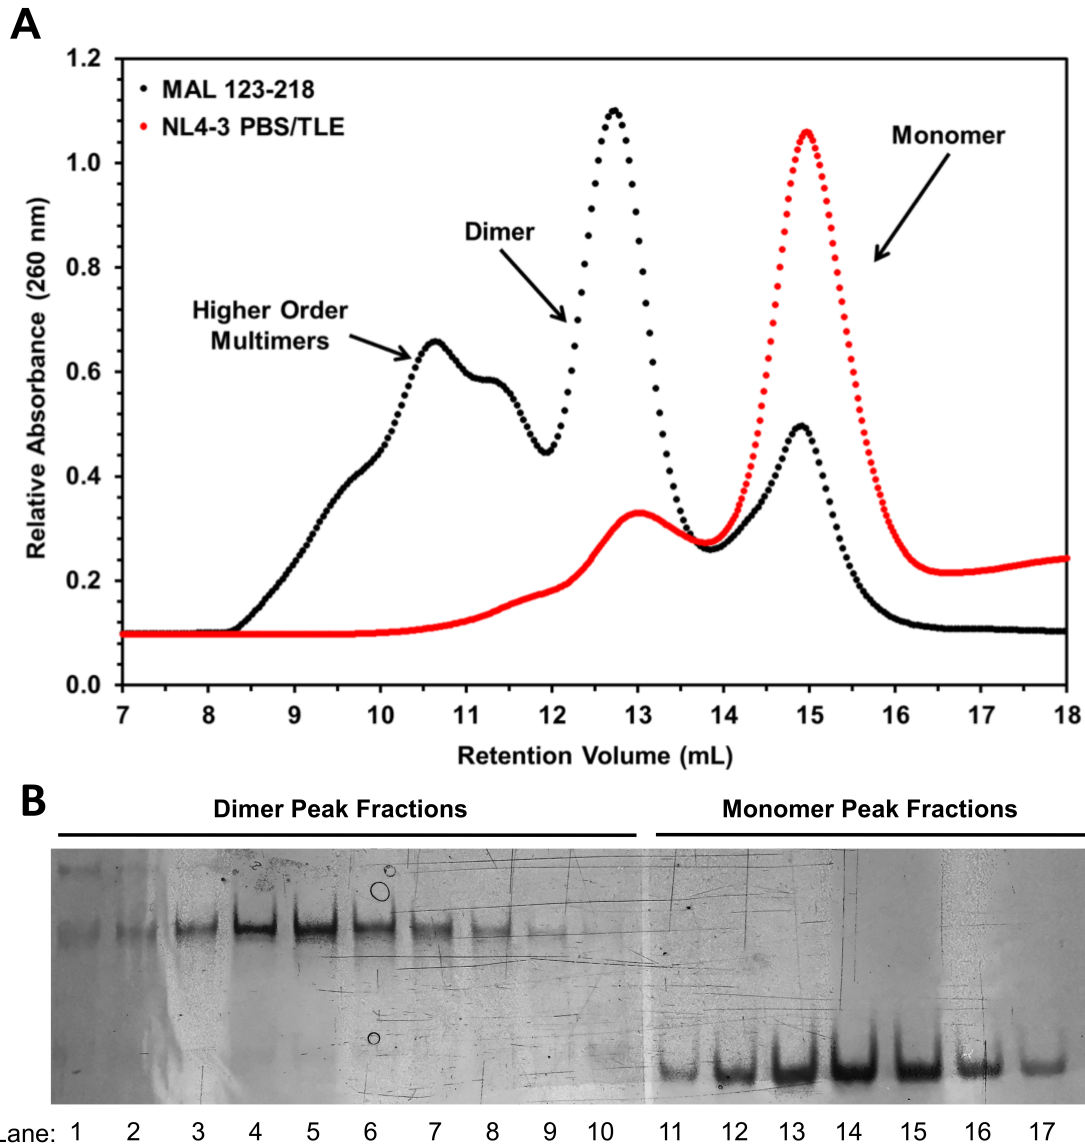

Figure S3. Purification and oligomeric states of MAL 123-218. (A) Size exclusion chromatography (SEC) of MAL 123-218 (black) and NL4-3 PBS/TLE (red), performed as described in the Materials and Methods. The chromatography profile for each RNA was normalized to the absorbance of the highest peak in the trace. (B) Native polyacrylamide (8%) gel analysis of MAL 123-218 fractions following SEC purification. Fractions collected from retention volumes ~12-16 mL were analyzed across two gels that were run simultaneously in the same apparatus and for the same length of time.
