# Supplementary material for: Conservation of tRNA mimicry in the 5′-untranslated region of distinct HIV-1 subtypes
Source: PubMed Central journal article supplement — RNA. 2017 Dec;23(12):1850–9. doi: 10.1261/rna.062182.117 (PMC5689005; doi:10.1261/rna.062182.117), 2017-12
Supplement: supp_062182.117_Supplemental_Fig_S4.pdf [file supp_062182.117_Supplemental_Fig_S4.pdf]

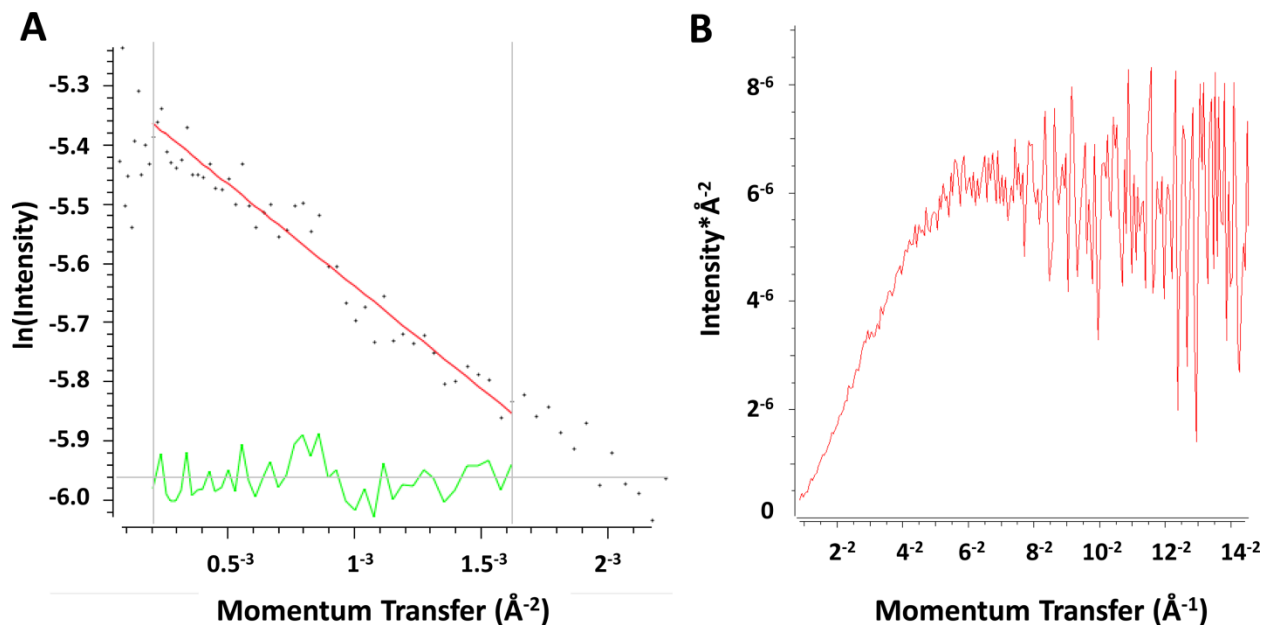

Figure S4. Analysis of MAL 123-218 SAXS data. (A) The Guinier plot of the low scattering angle ( $\text{\AA}^{-2}$ ) region of the SAXS data fits well to a linear regression (red line) with low residuals (green line), indicating that the RNA was not aggregated. (B) The Kratky plot shows a leveling off as momentum transfer/scattering angle increases, indicating that the RNA is non-globular, but well-folded and extended in solution.
