# Supplementary material for: Conservation of tRNA mimicry in the 5′-untranslated region of distinct HIV-1 subtypes
Source: PubMed Central journal article supplement — RNA. 2017 Dec;23(12):1850–9. doi: 10.1261/rna.062182.117 (PMC5689005; doi:10.1261/rna.062182.117), 2017-12
Supplement: supp_062182.117_Supplemental_Table_S1.pdf [file supp_062182.117_Supplemental_Table_S1.pdf]

Table S1. Sequences of primers used to prepare the MAL RNA constructs.

| Primer name           | Sequence                                        |
|-----------------------|-------------------------------------------------|
| MAL del 1-122 forward | 5'-TAATACGACTCACTATAGGCTCTGGTAACTAGAGATCCC-3'   |
| MAL del 1-122 reverse | 5'-GGGATCTCTAGTTACCAGAGCCTATAGTGAGTCGTATTA-3'   |
| MAL 218 FokI forward  | 5'-CAGGGACTCGAAAGCCATCCGGAAGTTCCAGAGAAG-3'      |
| MAL 218 FokI reverse  | 5'-CTTCTCTGGA ACTTCCGGATGGCTTTCGAGTCCCTG-3'     |
| MAL 349 FokI forward  | 5'-GGAGAGAGATGGGTGCGCATCCAGAGCGTCAGTATTAAG-3'   |
| MAL 349 FokI reverse  | 5'-CTTAATACTGACGCTCTGGATGCGCACCCATCTCTCTCC-3'   |
| HP1 forward           | 5'-TAATACGACTCACTATAGGCGACGGTGTA AAAATCTCGCC-3' |
| HP1 reverse           | 5'-GGCGAGATTTTTACACCGTCGCCTATAGTGAGTCGTATTA-3'  |
| HP2 forward           | 5'-TAATACGACTCACTATAGGGCTTTAAAGTGAAAGCCC-3'     |
| HP2 reverse           | 5'-GGGCTTTCAC TTTAAAGCCCTATAGTGAGTCGTATTA-3'    |
